| TTE Variable  | T0           | T1           | T2           | p-value<br>(T0 vs T1) | p-value<br>(T1 vs T2) | p-value<br>(T0 vs T2) |
|---------------|--------------|--------------|--------------|-----------------------|-----------------------|-----------------------|
| 2D LAEDV (ml) | 44.4±14.8    | 50.3±14.1    | 48.6±15.1    | <b>0.007</b>          | 0.424                 | <b>0.049</b>          |
| 2D LVEDV (ml) | 75.1±19.0    | 82.9±20.2    | 78.9±18.6    | <b>0.005</b>          | 0.122                 | 0.137                 |
| 2D LVESV (ml) | 27.0±10.0    | 32.5±12.2    | 30.5±11.2    | <b>0.001</b>          | 0.204                 | <b>0.019</b>          |
| 2D LVEF (%)   | 64.2±7.6     | 61.1±8.2     | 61.6±8.0     | <b>0.006</b>          | 0.656                 | <b>0.016</b>          |
| 2D GLS (%)    | -19.8±2.7    | -18.5±3.0    | -18.7±3.1    | <b>0.003</b>          | 0.686                 | <b>0.012</b>          |
| 3D LVEF (%)   | 60.2±6.7     | 56.9±6.3     | 58.7±5.5     | <b>0.022</b>          | 0.166                 | 0.271                 |
| 3D LVEDV (ml) | 81.8±18.5    | 91.4±18.8    | 84.2±18.8    | <b>0.017</b>          | 0.079                 | 0.545                 |
| 3D LVESV (ml) | 32.8±10.6    | 39.8±11.7    | 34.9±9.8     | <b>0.005</b>          | <b>0.046</b>          | 0.332                 |
| GWl           | 1756.9±319.2 | 1614.3±338.5 | 1650.6±357.5 | <b>0.005</b>          | 0.465                 | <b>0.035</b>          |
| GCW           | 2105.6±352.0 | 1970.5±376.2 | 2013.3±379.3 | <b>0.015</b>          | 0.427                 | 0.086                 |
| GWW           | 121.1±66.6   | 161.1±84.1   | 148.0±85.0   | <b>0.001</b>          | 0.281                 | <b>0.02</b>           |
| GWE           | 93.5±3.1     | 91.1±4.5     | 92.0±4.7     | <b>0.001</b>          | 0.171                 | <b>0.012</b>          |
